# Supplementary material
Source: Springer Nature journal article supplement (https://www.springermedizin.de/resource/supplementary/13011_2012_226_MOESM1_ESM.pdf/9628676)

Articles identified by literature review (n=567)

Excluded on the basis of title or abstract review, including articles related to CBPR/PAR (n=479)

Entire article reviewed (n=88)

**Excluded articles related to youth and patient populations that did not refer to PWUD (n=13)**  
**Excluded on the basis of entire article review (n=56)**

Included in literature review (n=19)

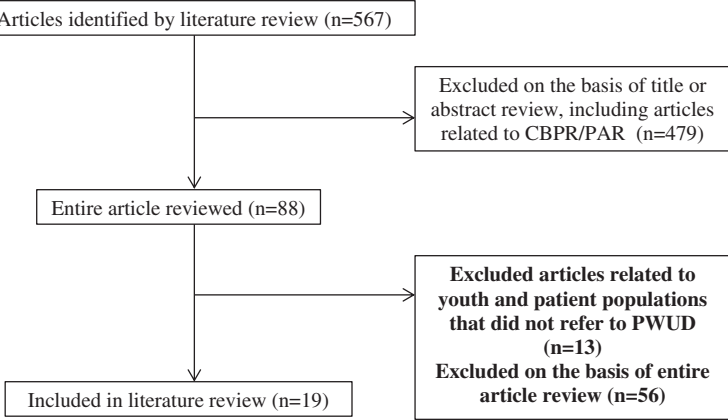

Supplement: MOESM1 [file 9628676]
